# Supplementary material for: Construction of shell-like carbon superstructures through anisotropically oriented self-assembly for distinct electromagnetic wave absorption
Source: Royal Society of Chemistry journal article supplement (doi:10.1039/d3ta06822f), 2024-01-01
Supplement: d3ta06822f1.pdf [file d3ta06822f1.pdf]

## Construction of shell-like carbon superstructures through anisotropically oriented self-assembly for distinct electromagnetic wave absorption

Xiao Li<sup>a</sup>, Haowei Zhou<sup>a</sup>, Jinlin Zhang<sup>a</sup>, Xinyue Zhang<sup>b</sup>, Man Li<sup>a</sup>, Jieyan Zhang<sup>a</sup>, Moustafa Adel Darwish<sup>c</sup>, Tao Zhou<sup>d</sup>, Shi-Kuan Sun<sup>e</sup>, Lei Xie<sup>b,\*</sup>, Di Zhou<sup>a,\*</sup>

<sup>a</sup>Multifunctional Materials and Structures, Key Laboratory of the Ministry of Education & International Center for Dielectric Research, School of Electronic Science and Engineering, Xi'an Jiaotong University, Xi'an, 710049, PR China. E-mail: zhou di1220@xjtu.edu.cn

<sup>b</sup>The Key Laboratory of Biomedical Information Engineering of Ministry of Education, School of Life Science and Technology, Xi'an Jiaotong University, Xi'an, 710049, PR China. E-mail: leixie@xjtu.edu.cn

<sup>c</sup>Physics Department, Faculty of Science, Tanta University, Al-Geish st., Tanta 31527, Egypt.

<sup>d</sup>School of Electronic and Information Engineering, Hangzhou Dianzi University, Hangzhou, 310018, PR China.

<sup>e</sup>School of Material Science and Energy Engineering, Foshan University, Foshan, Guangdong, 528000, PR China.

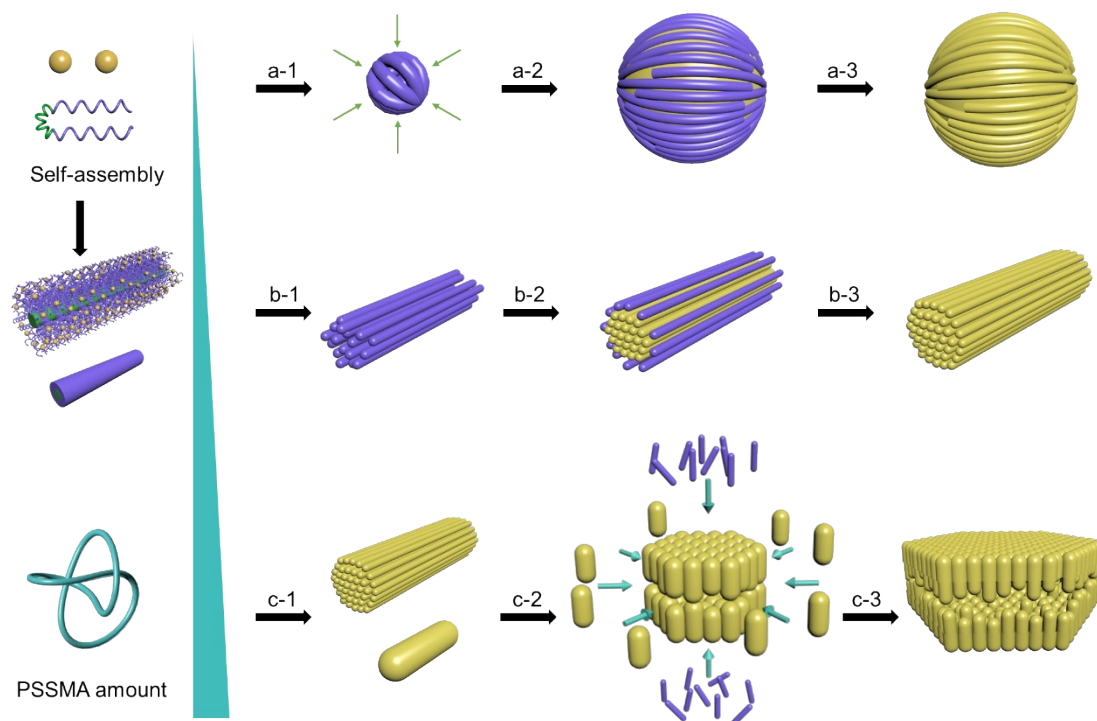

**Figure S1.** The formation mechanism of various carbon materials with different PSSMA amount. (a) sphere-like carbon material without PSSMA, (b) rod-like carbon material with 100 mg of PSSMA, and (c) shell-like carbon superstructure with 150 mg of PSSMA.

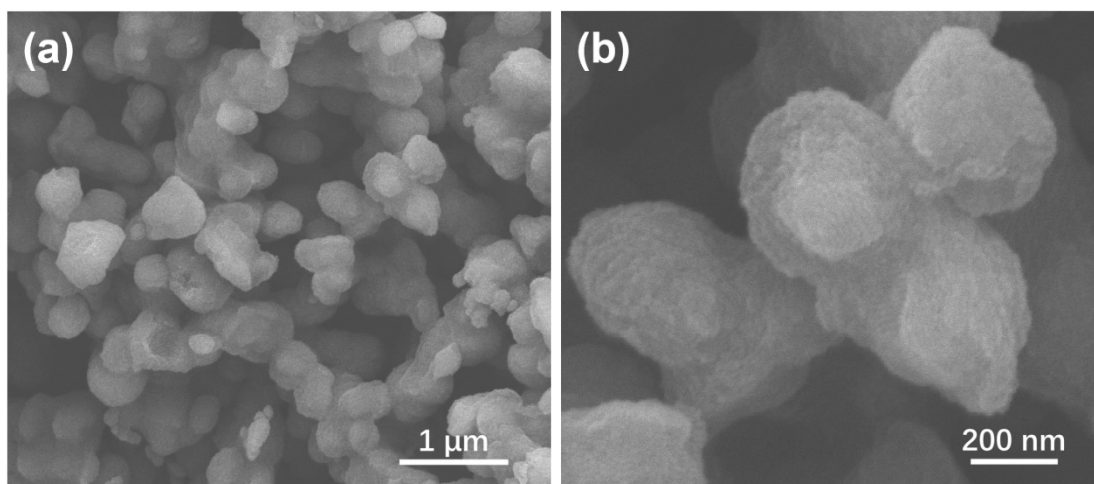

**Figure S2.** SEM images of sphere-like carbon materials.

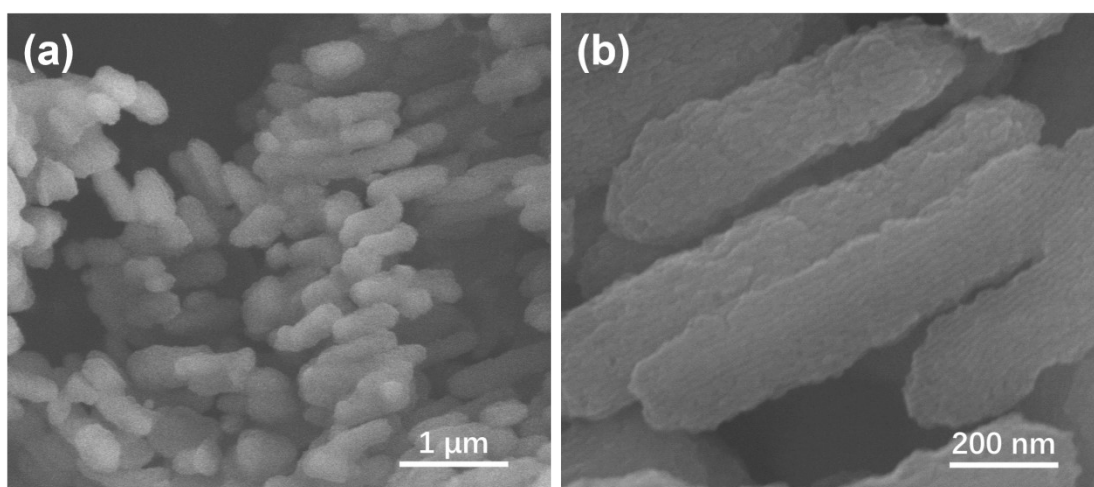

**Figure S3.** SEM images of rod-like carbon materials.

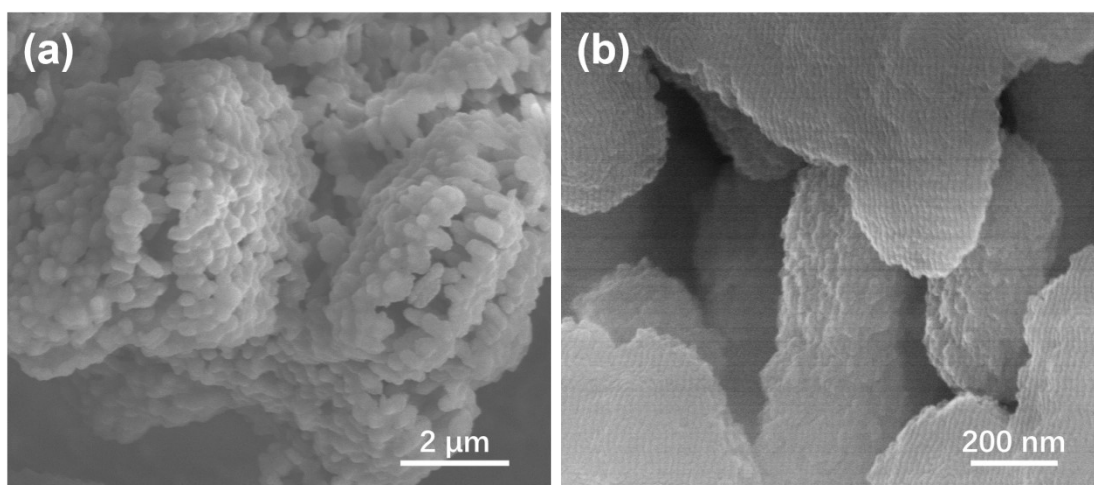

**Figure S4.** SEM images of shell-like carbon superstructures.

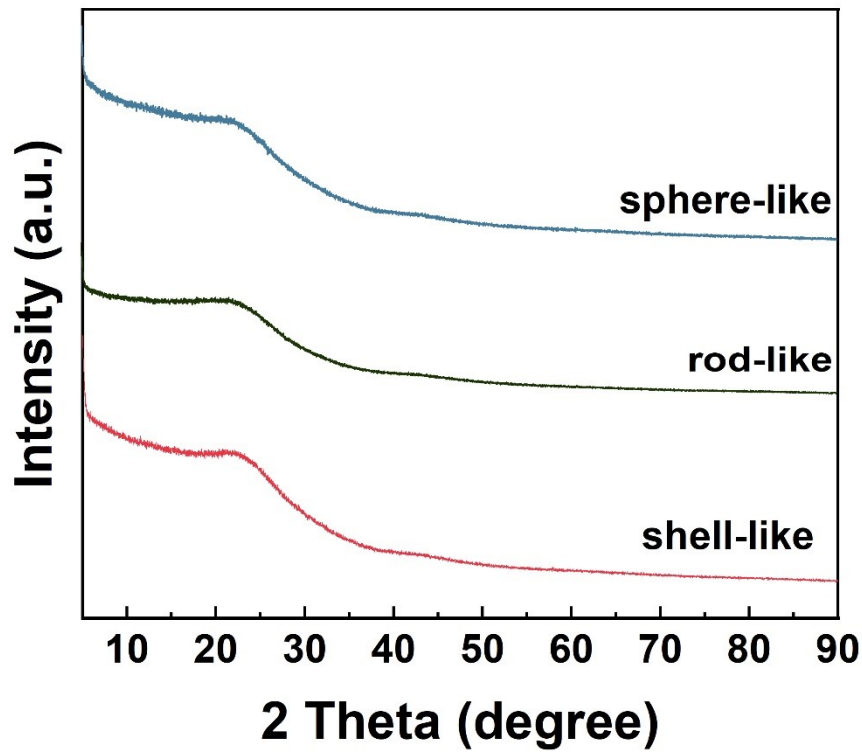

**Figure S5.** XRD patterns of three samples.

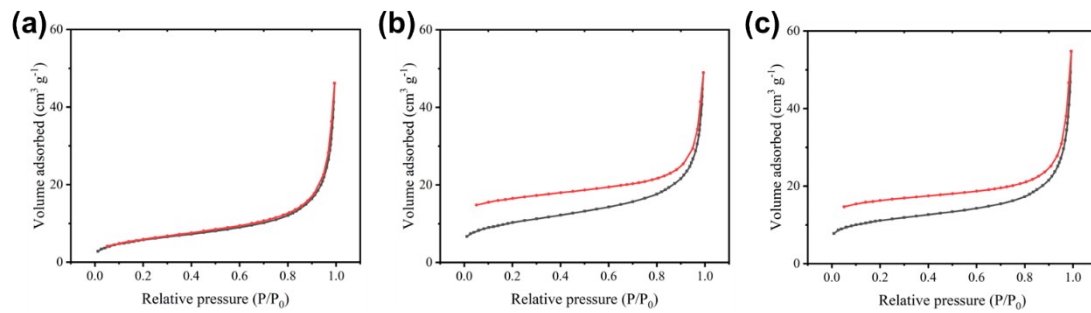

**Figure S6.** Nitrogen adsorption-desorption isotherms of (a) sphere-like, (b) rod-like, and (c) shell-like carbon superstructures.

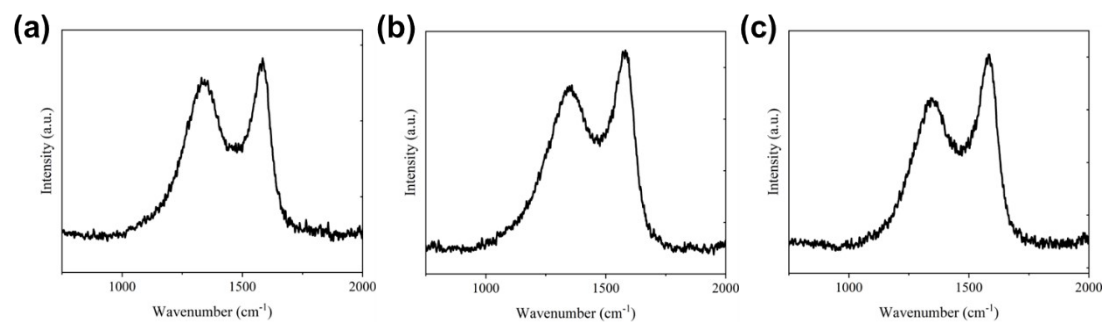

**Figure S7.** Raman spectra of (a) sphere-like, (b) rod-like, and (c) shell-like carbon superstructures.

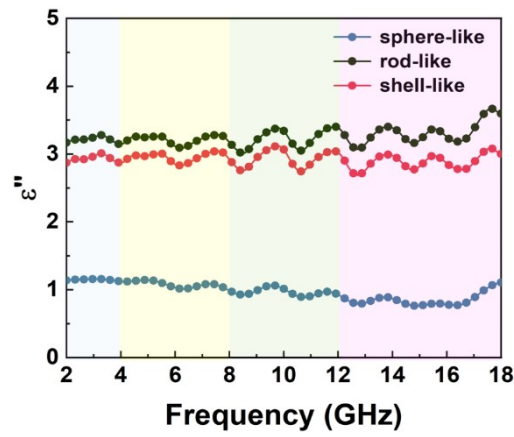

**Figure S8.** Imaginary part of the permittivity vs frequency of sphere-like, rod-like and shell-like carbon superstructures.

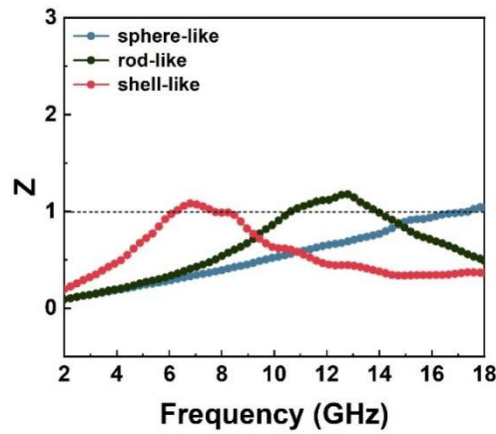

**Figure S9.** Z values vs frequency of three samples at the thicknesses corresponding to their respective strongest reflection loss values.

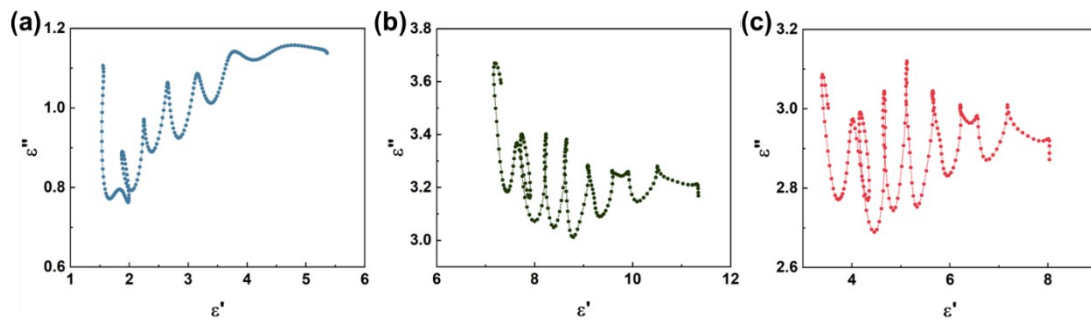

**Figure S10.** Cole-Cole curves vs frequency of (a) sphere-like, (b) rod-like, and (c) shell-like carbon superstructures.

**Table S1.** Microwave absorption properties of carbon materials have been reported.

| Absorber | Maximum<br>RL (dB<br>) | Matching<br>frequency<br>(GHz) | Maximum<br>EAB (G<br>Hz) | Matching<br>thickness(mm) | Ref |
|----------|------------------------|--------------------------------|--------------------------|---------------------------|-----|
|----------|------------------------|--------------------------------|--------------------------|---------------------------|-----|

---

|                                                                               |         |       |       |      |    |
|-------------------------------------------------------------------------------|---------|-------|-------|------|----|
| N-doped carbon<br>microsphere<br>composites with<br>concavo-convex<br>surface | -46.8   | 10.4  | 3.7   | 2.7  | S1 |
| Biomass<br>hierarchical<br>porous carbon                                      | -47.463 | 9.796 | 3.402 | 2.8  | S2 |
| hollow carbon<br>cubes                                                        | -38.0   | —     | 1.1   | 4    | S3 |
| porous carbon<br>hollow nanoboxes                                             | -30.46  | 15.68 | 5.44  | 2.2  | S4 |
| mushroom cap-<br>shaped porous<br>carbon particles                            | -42.40  | 14.86 | 4.37  | 1.6  | S5 |
| Multi-shell<br>hollow porous<br>carbon<br>nanoparticles                       | -18.13  | 14.66 | 5.17  | 1.6  | S6 |
| Shaddock<br>Peel-Based<br>Carbon                                              | -29.50  | —     | 2.44  | 2.5  | S7 |
| three-dimensional<br>cross-linked<br>carbon fiber                             | -44.44  | —     | 3.64  | 1.17 | S8 |

---

## References

[S1] Wang, J.; Ren, J.; Li, Q.; Liu, Y.; Zhang, Q.; Zhang, B. Synthesis and Microwave Absorbing

Properties of N-Doped Carbon Microsphere Composites with Concavo-Convex Surface. *Carbon* **2021**, *184*, 195-206.

[S2] Wu, Z.; Meng, Z.; Yao, C.; Deng, Y.; Zhang, G.; Wang, Y. Rice Husk Derived Hierarchical Porous Carbon with Lightweight and Efficient Microwave Absorption. *Materials Chemistry and Physics* **2022**, *275*.

[S3] Yuan, C.; Wu, W.-W.; Liu, Y.; Wang, Z.; Wang, Y.; Han, L.-L.; Zhou, Q.; Liu, J.-Q.; Liu, P. High Yield Hollow Carbon Cubes with Excellent Microwave Absorption Property at a Low Loading Ratio. *Carbon* **2022**, *195*, 101-111.

[S4] Wei, S.; Shi, Z.; Wei, W.; Wang, H.; Dastan, D.; Huang, M.; Shi, J.; Chen, S. Facile Preparation of Ultralight Porous Carbon Hollow Nanoboxes for Electromagnetic Wave Absorption. *Ceramics International* **2021**, *47* (19), 28014-28020.

[S5] Yang, W.; Yang, X.; Hu, J.; Liu, D.; Dong, Y.; Zhu, Y.; Fu, Y. Mushroom Cap-Shaped Porous Carbon Particles with Excellent Microwave Absorption Properties. *Applied Surface Science* **2021**, *564*.

[S6] Tao, J.; Zhou, J.; Yao, Z.; Jiao, Z.; Wei, B.; Tan, R.; Li, Z. Multi-Shell Hollow Porous Carbon Nanoparticles with Excellent Microwave Absorption Properties. *Carbon* **2021**, *172*, 542-555.

[S7] Gu, W.; Sheng, J.; Huang, Q.; Wang, G.; Chen, J.; Ji, G. Environmentally Friendly and Multifunctional Shaddock Peel-Based Carbon Aerogel for Thermal-Insulation and Microwave Absorption. *Nano-Micro Letters* **2021**, *13* (1), 10201-10214.

[S8] Dai, B.; Li, J.; Liu, X.; Wang, N.; Dai, Y.; Qi, Y. Multiple Synergistic Losses in the Absorption of Electromagnetic Waves by Three-Dimensional Cross-Linked Carbon Fiber. *Carbon* **2022**, *195*, 308-318.
